# Supplementary material for: The impact of the ‘hub and spoke’ model of care for lung cancer and equitable access to surgery
Source: HighWire-hosted journal article supplement (doi:10.1136/thoraxjnl-2014-205841), 2014-09-02

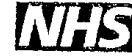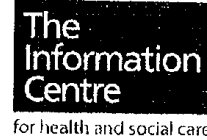

for health and social care

## Data Sharing Agreement - Amendment

**Amendment Ref: IC381a1DS**

**Original IG Ref: IC381DS**

This Data Sharing Agreement (Agreement) is drawn up between **The Health & Social Care Information Centre (HSCIC)** 1 Trevelyan Square, Boar Lane, Leeds, LS1 6AE and **Division of Epidemiology and Public Health**, University of Nottingham, Clinical Sciences Building, Nottingham City Hospital, NG5 1PB.

This document sets out the following amendment(s) to the original Data Sharing Agreement identified above:

### 2.0 Period of agreement

The amendment is effective from 26<sup>th</sup> November 2012 and will terminate on 31<sup>st</sup> December 2013 unless extended by the mutual agreement of both parties in writing, at which point a new agreement will be drafted.

**All other terms and conditions within the original Data Sharing Agreement remain unchanged.**

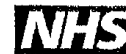

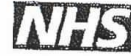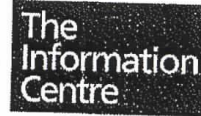

for health and social care

**Agreement Signatures**

For and on behalf of:

**Division of Epidemiology and Public Health**

Signed:

Print Name: AMIR KHAKWANI

Post/Title: PHD STUDENT

Date: 11-02-2013

**Division of Epidemiology and Public Health**

University of Nottingham

Clinical Sciences Building

Nottingham City Hospital

NG5 1PB

**Health & Social Care Information Centre  
Director of Information Governance on behalf  
of the HSCIC Caldicott Guardian**

Signed:

Print Name: Clare Sanderson

Date: 21.2.2013

**The Health & Social Care Information Centre**

1 Trevelyan Square

Boar Lane

Leeds LS1 6AE

For and on behalf of:

**The Health & Social Care Information Centre**

Signed:

Print Name: J. HENDERSON

Post/Title: ACTING HEAD OF CLINICAL ANALYSIS

Date: 19/2/13

**The Health & Social Care Information Centre**

1 Trevelyan Square

Boar Lane

Leeds LS1 6AE

For and on behalf of:

**Healthcare Quality Improvement Partnership  
(HQIP)**

Signed:

Print Name: ROBIN BURGESS

Date: 31/1/13

**Healthcare Quality Improvement Partnership  
(HQIP)**

Holland House, 4 Bury Street,

London EC3A 5AW

FOR HEALTH AND SOCIAL CARE  
FOR HEALTH AND SOCIAL CARE

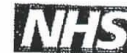

Supplement: thoraxjnl-2014-205841supp.pdf [file thoraxjnl-2014-205841supp.pdf]
